# Supplementary material for: Protocol for a systematic review and meta-analysis of recurrence and metastasis of different surgical techniques for non-small cell lung cancer
Source: HighWire-hosted journal article supplement (doi:10.1136/bmjopen-2024-086503), 2024-08-01
Supplement: bmjopen-2024-086503supp003_data_supplement.pdf [file bmjopen-2024-086503supp003_data_supplement.pdf]

**Supplemental File 3.** General information of the included studies.

|                                                                                                                                                                                                                               |  |  |
|-------------------------------------------------------------------------------------------------------------------------------------------------------------------------------------------------------------------------------|--|--|
| First author                                                                                                                                                                                                                  |  |  |
| Country, year                                                                                                                                                                                                                 |  |  |
| Sample size (males/females)                                                                                                                                                                                                   |  |  |
| Median age, y (range)                                                                                                                                                                                                         |  |  |
| Design                                                                                                                                                                                                                        |  |  |
| Include or exclude                                                                                                                                                                                                            |  |  |
| Reason(s) for exclusion                                                                                                                                                                                                       |  |  |
| Follow-up (mean and range) (months)                                                                                                                                                                                           |  |  |
| Tumor location                                                                                                                                                                                                                |  |  |
| Tumor size(cm)                                                                                                                                                                                                                |  |  |
| Tumor stage                                                                                                                                                                                                                   |  |  |
| Surgery procedure                                                                                                                                                                                                             |  |  |
| Adjuvant treatment                                                                                                                                                                                                            |  |  |
| Primary outcomes:<br>1. Overall recurrence rate<br>2. Local recurrence rate (ipsilateral lung, ipsilateral pleura, trachea, etc.)<br>3. Distant metastasis rate (contralateral lung, contralateral pleura, bone, liver, etc.) |  |  |
| Second outcomes:<br>1. Regional recurrence rate<br>2. Lymph node metastasis rate                                                                                                                                              |  |  |
